# Supplementary material for: High-Dimensional Cytometry Dissects Immunological Fingerprints of Idiopathic Inflammatory Myopathies
Source: MDPI journal article supplement (doi:10.3390/cells11203330), 2022-10-21
Supplement: s1 [file s1]

**Supplementary Table S1: Antibodies used for flow cytometric analysis of PBMCs**

| <b>Supplementary Table S1: Antibodies used for flow cytometric analysis of peripheral blood mononuclear cells</b> |                |              |                 |
|-------------------------------------------------------------------------------------------------------------------|----------------|--------------|-----------------|
| <b>Fluorochrome</b>                                                                                               | <b>Antigen</b> | <b>Clone</b> | <b>Company</b>  |
| BrilliantViolet650                                                                                                | CD3            | UCHT1        | Biolegend       |
| ECD                                                                                                               | CD56           | N901         | Beckman Coulter |
| BrilliantViolet785                                                                                                | CD4            | Okt4         | Biolegend       |
| APC-AlexaFluor700                                                                                                 | CD8            | B9.11        | Beckman Coulter |
| BrilliantViolet650                                                                                                | CD27           | O323         | Biolegend       |
| FITC                                                                                                              | CD45RA         | ALB11        | Beckman Coulter |
| PC                                                                                                                | CD196          | B-R35        | Beckman Coulter |
| PC5.5                                                                                                             | CD194          | L291H4       | Biolegend       |
| FITC                                                                                                              | CD183          | G025H7       | Biolegend       |
| KO525                                                                                                             | CD146          | TEA 1/34     | Beckman Coulter |
| APC                                                                                                               | CXCR5          | J252D4       | Biolegend       |
| PE                                                                                                                | PD-1           | EH12.2H7     | Biolegend       |
| BrilliantViolet780                                                                                                | CD161          | HP-3G10      | Biolegend       |
| PE                                                                                                                | IL-23R         | HLT2736      | Biolegend       |
| PC5.5                                                                                                             | CD31           | WM59         | Biolegend       |
| PE                                                                                                                | FoxP3          | 206D         | Biolegend       |
| APC-A700                                                                                                          | CD127          | R34.34       | Beckman Coulter |
| Violet660                                                                                                         | CD25           | BC96         | Biolegend       |
| APC                                                                                                               | CD226/DNAM-1   | 11A8         | Biolegend       |
| PE                                                                                                                | CD39           | REA739       | Miltenyi        |
| Alexa Fluor 700                                                                                                   | CD14           | M5E2         | Biolegend       |
| APC-AlexaFluor700                                                                                                 | CD19           | J3-119       | Beckman Coulter |
| FITC                                                                                                              | CD1c           | L161         | Biolegend       |
| PE                                                                                                                | CD69           | FN50         | Biolegend       |
| BrilliantViolet510                                                                                                | HLA-DR         | L243         | Biolegend       |
| FITC                                                                                                              | IgD            | IA6-2        | Biolegend       |
| KO525                                                                                                             | IgM            | MHM-88       | Biolegend       |
| PC5.5                                                                                                             | CD38           | LS198-4-3    | Beckman Coulter |
| PB450                                                                                                             | CD21           | B-ly4        | BD Biosciences  |
| ECD                                                                                                               | CD24           | ALB9         | Beckman Coulter |
| BrilliantViolet780                                                                                                | CD11c          | 3.9          | Biolegend       |
| PE                                                                                                                | IgG4           | QA16A15      | Biolegend       |

|                    |               |           |                 |
|--------------------|---------------|-----------|-----------------|
| APC                | IgG1          | QA16A12   | Biolegend       |
| BrilliantViolet660 | CD80          | 2D10      | Biolegend       |
| FITC               | CX3CR1        | 2A9-1     | Biolegend       |
| FITC               | CD223/LAG3    | 7H2C65    | Biolegend       |
| APC                | TIM3          | A18087E   | Biolegend       |
| APC                | CD253         | RIK-2     | Biolegend       |
| C=385              | CD18          | TS1/18    | Biolegend       |
| FITC               | Perforin      | dG9       | Biolegend       |
| PECy7              | Granzyme A    | GzA-3G8.5 | BD Biosciences  |
| PE                 | Granzyme B    | REA226    | Miltenyi        |
| FITC               | Granzyme K    | GM6C3     | SantaCruz       |
| eFluor660          | Granzyme M    | 4B2G4     | Biosciences     |
| PE                 | CD34          | 581       | Biolegend       |
| PerCP              | NKp46 PC5.5-A | 9E2       | Biolegend       |
| KO525              | CD117         | 95C3      | Beckman Coulter |
| BrilliantViolet780 | CD62L         | DREG-56   | Biolegend       |
| FITC               | KIR           | HP-MA4    | Biolegend       |
| PE                 | CD57          | HCD57     | Biolegend       |
| PE                 | NKG2C         | S19005E   | Biolegend       |
| Biotin             | CD337 / NKp3  | AF29-4D12 | Milteny         |
| FITC               | IFN- $\gamma$ | 4S.B3     | Biolegend       |
| FITC               | CD223/LAG3    | 7H2C65    | Biolegend       |
| FITC               | CD107a        | H4A3      | BD Biosciences  |
| FITC               | Perforin      | dG9       | Biolegend       |
| PE                 | CD57          | HCD57     | Biolegend       |
| PE                 | MCP-1/CCL2    | 2H5       | Biolegend       |
| PE                 | TNF $\alpha$  | MAb11     | Biolegend       |
| PE                 | Granzyme B    | REA226    | Miltenyi        |
| ECD                | CD56          | N901      | Beckman Coulter |
| ECD                | CD16          | 3G8       | Beckman Coulter |
| PE-Cy5.5           | CD3           | UCHT1     | Beckman Coulter |
| PerCP-Cy5.5        | CD45RO        | UCHL1     | Biolegend       |
| PerCP-Cy5.5        | IL-6          | MQ2-13A5  | Biolegend       |

|                    |              |         |                 |
|--------------------|--------------|---------|-----------------|
| PerCP-Cy5.5        | KLRG1        | SA231A2 | Biolegend       |
| PE-Cy7             | CX3CR1       | 2A9-1   | Biolegend       |
| PE-Cy7             | CTLA-4/CD152 | BNI3    | Biolegend       |
| APC                | CD4          | 13B8.2  | Beckman Coulter |
| APC-Cy7            | CD8          | HIT8a   | Biolegend       |
| PacificBlue        | CD8          | B9.11   | Beckman Coulter |
| BrilliantViolet510 | CD4          | OKT4    | Biolegend       |
| BrilliantViolet510 | HLA-DR       | L243    | Biolegend       |
| BrilliantViolet510 | CD57         | QA17A04 | Biolegend       |

**Supplementary Table S2: Flow cytometric panels used for PBMC analysis**

| Supplementary Table S2: Flow cytometric panels used for PBMC analysis |                                                                                                            |
|-----------------------------------------------------------------------|------------------------------------------------------------------------------------------------------------|
| Panel                                                                 | Antigens                                                                                                   |
| Basic panel (Figure 2)                                                | CD3, CD4, CD8, CD19, CD20, CD56, live/dead marker                                                          |
| CD8 T cell panel 1 (Figure 3)                                         | CD3, CD4, CD8, CD27, CD45ro, CD56, CD226, CD57, CD28, live/dead marker                                     |
| CD8 T cell panel 2 (Figure 4A, 4B, 4C)                                | CD3, CD4, CD8, CD27, CD45ro, CD56, PD-1, TIM3, LAG3, CD18, live/dead marker                                |
| CD8 T cell panel 3 (Figure 4D, 4E)                                    | CD3, CD4, CD8, CD27, CD45ro, GM-CSF, IL-17A, IL-22, IL-4, IFN- $\gamma$ , TNF- $\alpha$ , live/dead marker |
| CD4 T cell panel (Figure 5)                                           | CD3, CD4, CD8, CD27, CD45ro, GM-CSF, IL-17A, IL-22, IL-4, IFN- $\gamma$ , TNF- $\alpha$ , live/dead marker |
| B cell panel (Figure 6)                                               | CD19, CD20, IgM, IgD, IgG1, IgG4, CD21, CD24, CD27, CD38, CD80, live/dead marker                           |
| T helper cell panel (Suppl. Fig. 1)                                   | CD3, CD4, CD8, CD146, CCR4, CCR6, CXCR3, ICOS, PD-1, live/dead marker                                      |
