# Supplementary figures and images for: High-Dimensional Cytometry Dissects Immunological Fingerprints of Idiopathic Inflammatory Myopathies
Source: MDPI journal article supplement (doi:10.3390/cells11203330), 2022-10-21

A

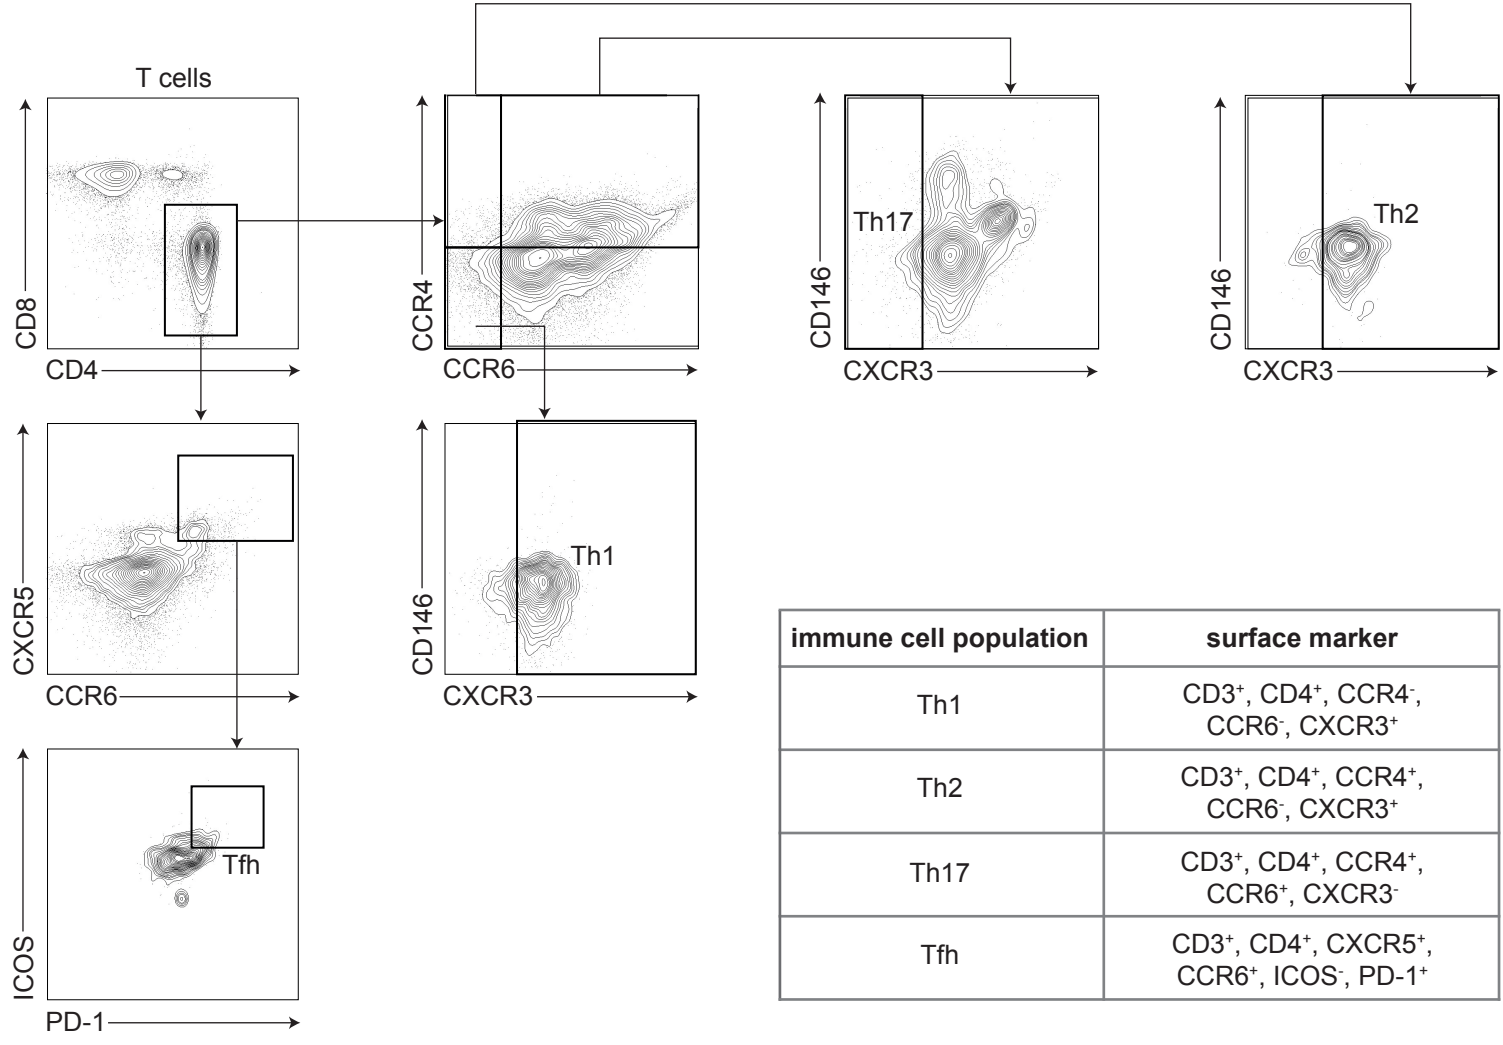

B

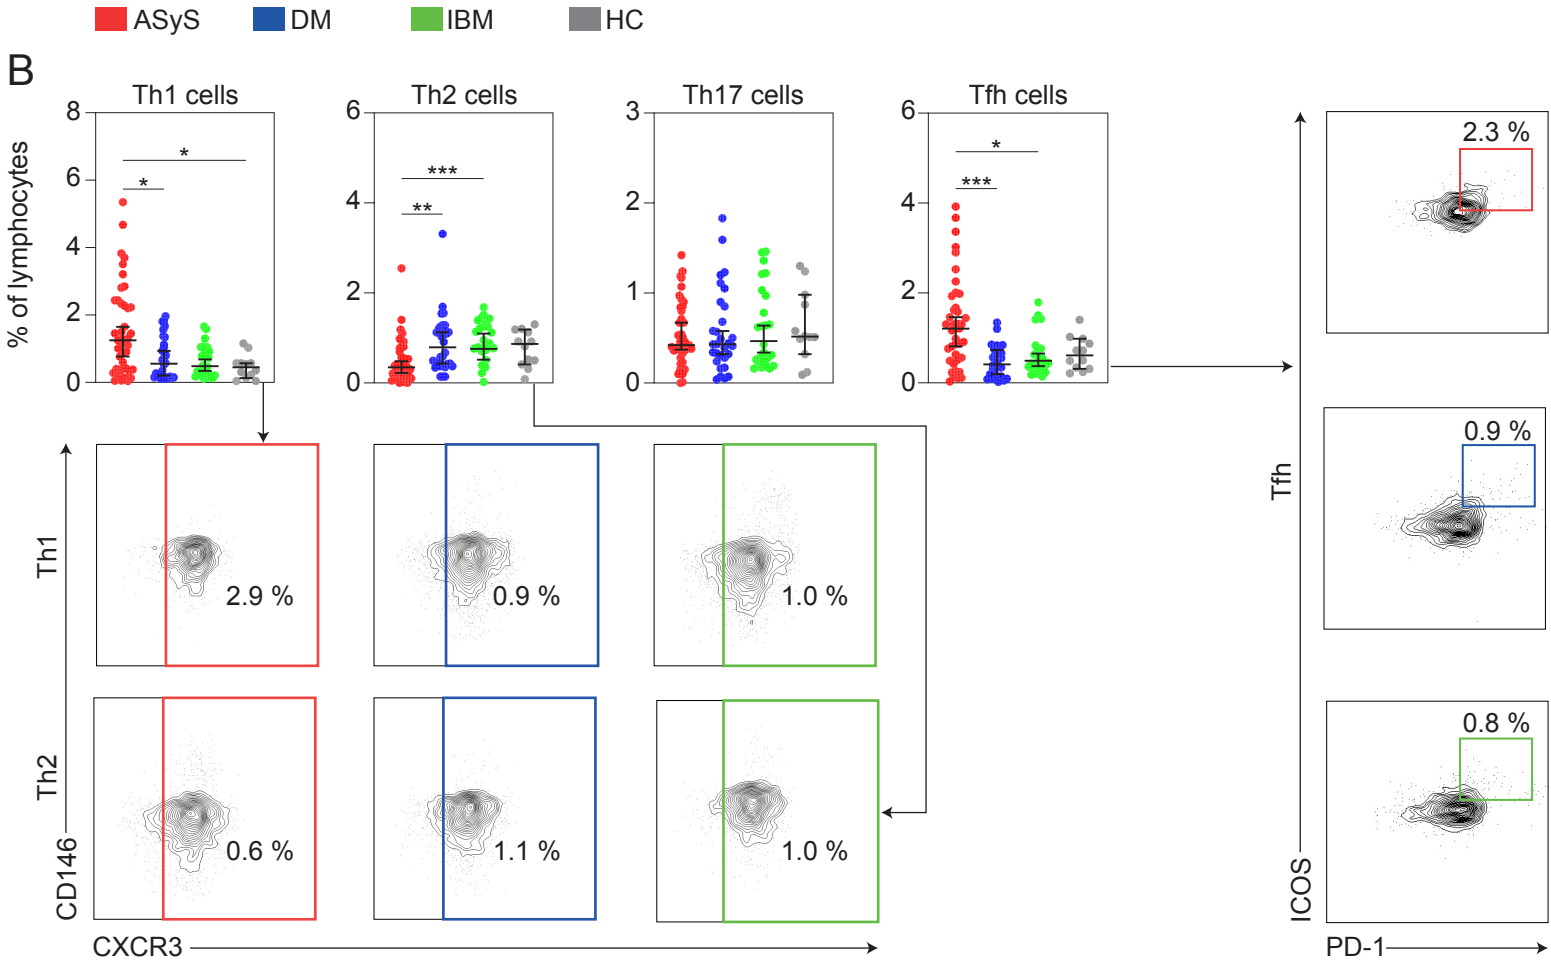

Supplement: s1 [file s1]
